# Reduction of spontaneous cortical beta bursts in Parkinson's disease is linked to symptom severity

**Running title:** Beta bursts in Parkinson's disease

**Authors:**

Mikkel C. Vinding<sup>1\*</sup>, Panagiota Tsitsi<sup>2</sup>, Josefine Waldthaler<sup>2,3</sup>, Robert Oostenveld<sup>1,4</sup>, Martin Ingvar<sup>1,5</sup>, Per Svenningsson<sup>2</sup> & Daniel Lundqvist<sup>1</sup>

**Affiliations:**

- 1) NatMEG, Department of Clinical Neuroscience, Karolinska Institutet, Stockholm, Sweden.
- 2) Neuro Svenningsson, Department of Clinical Neuroscience, Karolinska Institutet, Stockholm, Sweden.
- 3) Department of Neurology, University Hospital Marburg, Germany.
- 4) Donders Institute for Brain, Cognition and Behaviour, Radboud University, Nijmegen, Netherlands.
- 5) Section of Neuroradiology, Karolinska University Hospital, Stockholm, Sweden.

**\*Corresponding author**

Mikkel C. Vinding, Ph.D.

NatMEG, Department of Clinical Neuroscience  
Karolinska Institutet  
Nobels väg 9, D3  
171 77 Stockholm  
Sweden

Email: [mikkel.vinding@ki.se](mailto:mikkel.vinding@ki.se)

Word count: 6.570 (including legends and tables)

## Abstract

1 Parkinson's disease is characterized by a gradual loss of dopaminergic neurons, which are  
2 associated with altered neuronal activity in the beta band (13-30 Hz). Assessing beta band  
3 activity typically involves transforming the time-series to get the power of the signal in the  
4 frequency-domain. Such transformation assumes that the time-series can be reduced to a  
5 combination of steady-state sine- and cosine waves. However, recent studies have suggested  
6 that this approach masks relevant biophysical features in the beta band activity—for example,  
7 that the beta band exhibits transient bursts of high-amplitude activity.

8 In an exploratory study we used magnetoencephalography (MEG) to record cortical beta band  
9 activity to characterize how spontaneous cortical beta bursts manifest in Parkinson's patients  
10 ON and OFF dopaminergic medication, and compare this to matched healthy controls. From  
11 three minutes of MEG data, we extracted the time-course of beta band activity from the  
12 sensorimotor cortex and characterized high-amplitude epochs in the signal to test if they  
13 exhibited burst like properties. We then compared the rate, duration, inter-burst interval, and  
14 peak amplitude of the high-amplitude epochs between the Parkinson's patients and healthy  
15 controls.

16 Our results show that Parkinson's patients OFF medication had a 6-17% lower beta bursts rate  
17 compared to healthy controls, while both the duration and the amplitude of the bursts were the  
18 same for Parkinson's patients and healthy controls and medicated state of the Parkinson's  
19 patients. These data thus support the view that beta bursts are fundamental underlying features  
20 of beta band activity, and show that changes in cortical beta band power in PD can be explained  
21 primarily by changes in the underlying burst rate. Importantly, our results also revealed a  
22 relationship between beta bursts rate and motor symptom severity in PD: a lower burst rate  
23 scaled with increased in severity of bradykinesia and postural/kinetic tremor. Beta burst rate  
24 might thus serve as neuromarker for Parkinson's disease that can help in the assessment of  
25 symptom severity in Parkinson's disease or evaluate treatment effectiveness.

26 **Keywords:** Parkinson's disease, beta bursts, beta band, bradykinesia, resting-state.

## 1 Introduction

1 Parkinson's disease is a neurodegenerative disease that, most often, initially manifests with  
2 motor symptoms such as tremor, rigidity, and bradykinesia. The neurodegenerative process is  
3 characterized by a loss of dopamine and death of dopaminergic neurons throughout the basal  
4 ganglia-thalamic-cortical system (Rodriguez-Oroz et al., 2009; Kalia and Lang, 2015). The  
5 dopamine loss leads to widespread functional changes in brain activity; for instance, throughout  
6 the basal ganglia-thalamic-cortical network, oscillatory activity in the beta band (13–30 Hz)  
7 exhibits systematic disease-related changes in Parkinson's disease (Jenkinson and Brown,  
8 2011). The direct influence of dopamine has for example been demonstrated to increase beta  
9 band power in the sub-thalamic nucleus (STN) when Parkinson's patients are OFF  
10 dopaminergic medication as compared to ON medication (Alonso-Frech et al., 2006; Kühn et  
11 al., 2006; Mallet et al., 2008; Giannicola et al., 2010; Neumann et al., 2017). Increased beta  
12 power in the STN and the basal ganglia has further been linked to increased severity of  
13 bradykinesia and rigidity in Parkinson's patients (Kühn et al., 2006; Martin et al., 2018).  
14 Disease-related changes in the beta band are found not only in STN and basal ganglia in  
15 Parkinson's patients but is also present in the cortex, from where brain activity can be recorded  
16 non-invasively while patients are at rest, using magnetoencephalography (MEG) and  
17 electroencephalography (EEG).

18 Studies using MEG to assess neural activity while the participants were at rest show that  
19 Parkinson's patients have decreased cortical beta power compared to healthy controls  
20 (Bosboom et al., 2006; Heinrichs-Graham et al., 2014). However, in the early stages of  
21 Parkinson's disease, there seems to be an increase in beta power at rest compared to healthy  
22 controls (Pollok et al., 2012). Treatments for Parkinson's disease also seems to be effective  
23 through modulation of the cortical beta activity. Administration of dopaminergic medication  
24 has been shown to increase the cortical beta power in Parkinson's patients (Heinrichs-Graham  
25 et al., 2014; Melgari et al., 2014), suggesting that dopamine levels and the cortical beta power  
26 are inversely connected. Similarly, Parkinson's patients treated with electrical deep brain  
27 stimulation (DBS) showed an increase in cortical sensorimotor beta power following DBS  
28 compared to off treatment (Airaksinen et al., 2012; Cao et al., 2017). However, other studies  
29 have reported that DBS leads to a broader suppression of 5-25 Hz power in frontal and  
30 sensorimotor cortex (Abbasi et al., 2018; Luoma et al., 2018).

31 It is currently unclear whether the different directions of these disparate findings are due to  
32 differences in the Parkinson's patients (e.g., early-stage versus later-stage Parkinson's disease)  
33 or if they are due to uncertainties in the methods used to quantify beta activity. Beta activity is  
34 traditionally assessed by analyzing the MEG/EEG data in the frequency-domain, using various  
35 forms of Fourier-transforms (e.g., wavelet-analysis) of the data. Fourier-based methods assume  
36 that the oscillatory activity in the time series can be resolved as a sum of steady-state sine and  
37 cosine waves of varying frequency. There is however converging evidence that the oscillatory  
38 activity in the beta band does not occur at a steady state, but rather consists of short transient  
39 bursts lasting only one to a few beta band cycles (Leventhal et al., 2012; Bartolo and Merchant,  
40 2015; Feingold et al., 2015; Sherman et al., 2016). From the resulting power spectral densities  
41 (PSD) it is impossible to tell whether changes in beta band reflect a general change in the  
42 amplitude of steady-state oscillations, or if it reflects changes in the occurrence or amplitude of  
43 transient beta bursts. In all three cases, the output from the Fourier-transform will sum up to a  
44 shift in beta band power.

45 Several recent studies have explored the functional role of transient beta bursts in the motor  
46 cortex of healthy subjects. For instance, Shin et al. (2017) showed that the detection rate of a  
47 tactile stimulation was higher when the probability of a beta burst immediately before the  
48 stimulation was low, suggesting that the beta bursts exhibit a transient inhibitory effect on the  
49 processing of incoming sensory signals. The negative relationship between the probability of a  
50 beta burst and the detection rate of tactile stimulation has been demonstrated in both mice,  
51 monkeys, and humans (Sherman et al., 2016; Shin et al., 2017). Similarly, Little et al. (2018)  
52 showed a negative relationship between the probability of cortical beta bursts before a cued  
53 movement and reaction time in a cued reaction task, demonstrating that beta bursts have an  
54 inhibitory effect on outgoing movement initiation. Assessment of changes in beta activity in  
55 terms of transient bursts—rather than averaging in the frequency-domain—may contribute to a  
56 better understanding of what aspect of beta activity that changes in Parkinson's disease due to  
57 disease and medication.

58 There is similar evidence on the functional role of transient beta bursts from research assessing  
59 beta band activity in midbrain structures. The overall power changes in the beta band in the  
60 STN can, for example, be explained as changes in the rate of high beta amplitude epochs  
61 (Tinkhauser et al., 2017a, 2018). The high-amplitude beta epochs in STN showed both  
62 increased rate and longer durations when the patients were OFF dopaminergic medication as  
63 compared to ON medication. Lofredi et al. (2019) used similar measurements from STN in

64 patients undergoing surgery to find a decrease in beta bursts in the period leading up to a  
65 movement in a cued reaction task. The relation between beta bursts and movement initiation  
66 makes beta burst a potential tool for understanding loss of control and slowing of movement in  
67 Parkinson's disease (Tinkhauser et al., 2017b; Lofredi et al., 2019).

68 Analysis of beta activity at the level of beta bursts appear to be a functionally relevant approach  
69 for further understanding sensory-motor processing and may provide new insights into the  
70 function of the sensory-motor system that is lost in average based analysis method. Assessment  
71 of spontaneous beta bursts in Parkinson's patients from non-invasive recordings, such as MEG  
72 might, therefore, provide a more sensitive assessment on how the beta band activity changes  
73 due to the disease and may help to resolve the apparently conflicting results that emerge when  
74 assuming beta band activity consist of steady-state beta oscillations.

75 In this study, we used non-invasive MEG measurements from Parkinson's patients OFF and  
76 ON dopaminergic medication, and measurements from matched healthy controls, to investigate  
77 the occurrence of spontaneous transient beta bursts in the sensorimotor cortex. Our primary aim  
78 was to compare the characteristics (such as duration, amplitude, rate) of spontaneous beta burst  
79 in the sensorimotor cortex of Parkinson's patients to healthy controls. Our secondary aim was  
80 to explore whether any of the beta bursts characteristics changed with the presence of  
81 dopaminergic medication. Finally, a third aim was to investigate whether any of the beta bursts  
82 characteristics were linked to the severity of disease symptoms in Parkinson's disease.

## 2 Materials and methods

### 83 2.1 Participants

84 20 patients diagnosed with Parkinson's disease (age 41–85; five female) and 20 healthy controls  
85 (age 54–76; eight female) participated in the study. The study was approved by the regional  
86 ethics committee (Etikprövningsnämnden Stockholm, DNR: 2016/911-31/1) and followed the  
87 Declaration of Helsinki. All participants gave written informed consent before participating.

88 The patients were recruited from the Parkinson's Outpatient Clinic, Department of Neurology,  
89 Karolinska University Hospital, Stockholm, Sweden. The inclusion criteria for the Parkinson's  
90 patients were a diagnosis of typical Parkinson's disease according to the United Kingdom  
91 Parkinson's Disease Society Brain Bank Diagnostic Criteria with Hoehn and Yahr stage 1-3  
92 (Hoehn and Yahr, 1967), under treatment with Levodopa, Catechol-O-methyltransferase  
93 inhibitor (COMT) inhibitors, Monoaminoxidase-B (MAO-B) inhibitors, or dopamine receptor

94 agonists. Besides the diagnosis of Parkinson's disease, the patients were healthy according to a  
95 physical examination.

96 Healthy controls were recruited among healthy participants who previously had participated in  
97 studies within the preceding year, or amongst the patients' spouses.

98 Exclusion criteria for both groups were a diagnosis of major depression, dementia, history or  
99 presence of schizophrenia, bipolar disorder, epilepsy, or history of alcoholism or drug addiction  
100 according to the *Diagnostic and Statistical Manual of Mental Disorders DSM-V* (American  
101 Psychiatric Association, 2013). Additional exclusion criteria for the healthy controls were a  
102 diagnosis of Parkinson's disease or any form of movement disorder.

103 One patient canceled the participation in the study due to severe tremor in the OFF-medication  
104 state. One healthy control was excluded from analysis due to insufficient quality of the MEG  
105 recording. The analysis includes 19 patients and 19 healthy controls.

106 **Table 1: Summary of the Parkinson's group and control group.**

|                          | <b>Parkinson's patients</b>    | <b>Healthy controls</b>        |
|--------------------------|--------------------------------|--------------------------------|
| <i>N</i>                 | 19                             | 19                             |
| <i>Sex</i>               | 5 females, 14 males            | 8 females, 11 males            |
| <i>Age</i>               | 44-85 years (mean: 67.3 years) | 54-76 years (mean: 69.3 years) |
| <i>Disease duration</i>  | 1-14 years (median: 4.5 years) |                                |
| <i>LEDD</i>              | 300-1150 mg (median: 615 mg)   |                                |
| <i>MDS-UPDRS-III OFF</i> | 10-61 (median: 34)             |                                |
| <i>MDS-UPDRS-III ON</i>  | 5-39 (median: 16)              |                                |
| <i>MoCA</i>              | 25.5 (SD: 2.9)                 | (SD: 1.8)                      |

107 *LEDD*: levodopa equivalent daily dosage; *MDS-UPDRS-III*: Movement Disorder Society's  
108 Unified Parkinson's Disease Rating Scale part III; *MoCA*: Montreal Cognitive Assessment.

## 109 **2.2 Procedure**

110 The patients were instructed to omit their morning dose of dopaminergic medication on the day  
111 of participation. Thus, the OFF state was defined as a withdrawal period of 12 hours after the  
112 last dopaminergic medication. Patients were further instructed to bring their prescribed dose of  
113 medication, which they had to take during the experiment. All patients followed the  
114 instructions.

115 Preparation for the MEG recordings began as soon as the participants were briefed about the  
116 procedure and signed the written informed consent. The recordings consisted of three minutes  
117 where the participants sat with their eyes closed in the MEG scanner. Text on a screen placed  
118 in front the participants initially instructed the participants to close their eyes. Participants were  
119 instructed not to open their eyes before being told to, and to avoid moving until they were  
120 allowed to open their eyes. The recordings began once the experimenter through video  
121 observation had assured that participant's eyes were closed. The participants then did two  
122 unrelated tasks in the same recording session consisting of an active tapping task (Vinding et  
123 al., *in prep.*) and a task with passive movements (Vinding et al., 2019). Each MEG recording  
124 session took about one hour.

125 When the first session was over, participants had a break outside the scanner. During the break,  
126 the participants performed the neurological tests described below, and the patients took  
127 medication. The second MEG measurement began approximately one hour after medication.  
128 The healthy controls did not take any medication but had a similar duration break and measured  
129 twice to accommodate the potential effect of the fixed order of the OFF-ON measurements in  
130 patients.

131 Motor function was assessed in all participants using the motor subscale of the Movement  
132 Disorder Society's Unified Parkinson's Disease Rating Scale (MDS-UPDRS-III) (Goetz et al.,  
133 2007), by neurologists certified in the use of MDS-UPDRS. Patients were assessed immediately  
134 after the first MEG session in the OFF state and again after the second MEG session ON  
135 medication. Montreal Cognitive Assessment (MoCA) test was done in the ON state.

### 136 **2.3 MEG recordings**

137 MEG data were recorded with an Elekta Neuromag TRIUX 306-channel MEG system, with  
138 102 magnetometers and 102 pairs of orthogonal planar gradiometers, inside a two-layer  
139 magnetically shielded room (model Ak3B, Vacuumschmelze GmbH), with internal active  
140 shielding active to suppress electromagnetic artifacts. Data were recorded at 1000 Hz with an  
141 online 0.1 Hz high-pass filter and 330 Hz low-pass filter. The subjects' positions and  
142 movements inside the MEG scanner were measured during recordings with head-position  
143 indicator coils attached to subjects' heads. The location of the coils—and additional points  
144 giving a representation of the subjects' head shape—was digitalized with a Polhemus Fastrak  
145 motion tracker before the measurements. The head shapes were later used to co-register MEG  
146 data and structural MRI. Horizontal and vertical electrooculogram (EOG) and  
147 electrocardiogram (ECG) were recorded simultaneously with the MEG.

## 148 **2.4 Data processing**

149 MEG data were processed off-line by applying temporal signal space separation (tSSS) to  
150 suppress artifacts from outside the scanner helmet and correct for head movement during the  
151 recordings (Taulu and Simola, 2006). The tSSS had a buffer length of 10 s and a cut-off  
152 correlation coefficient of 0.95. Movement correction was done by shifting the head position to  
153 a position based on the median head position during the recording. We then did an independent  
154 component analysis (ICA) for each subject using the *fastica* algorithm (Hyvarinen, 1999)  
155 implemented in MNE-Python (Gramfort et al., 2013) in Python 2.7. Components related to  
156 saccadic eye-movements and heartbeats were identified based on their correlation with the EOG  
157 or ECG and removed from the data.

158 We then applied source reconstruction to the data using noise weighted minimum-norm  
159 estimates (dSPM) (Dale et al., 2000). The noise covariance matrix was estimated from two  
160 minutes of empty room data recorded before each session. The source space consisted of 5124  
161 evenly spaced points sampled across the white matter surfaces. The surfaces were obtained with  
162 the automatic routine for extracting cortical surfaces in Freesurfer (Dale et al., 1999) from  
163 individual T1 weighted MRI that were obtained on a GE Discovery 3.0 T or a Siemens Prisma  
164 3.0 T MR scanner. One subject did not complete an MR scan, so we used an MRI template  
165 (Holmes et al., 1998) warped to the subject's head shape as a substitute. From the MRI, we  
166 obtained the inner skull boundary, which was used to create a single compartment volume  
167 conductor model to estimate the forward model.

168 The cortical surface was then segmented into anatomical labels based on the automatic labeling  
169 algorithm in Freesurfer (Destrieux et al., 2010). Based on the labels, we extracted data from all  
170 point within a region of interest (ROI) consisting of the pre- and post-central gyri and central  
171 sulcus of the left hemisphere (Fig. 1). We then obtained a combined ROI time course as the  
172 first right-singular vector of a singular value decomposition of the source time courses within  
173 the ROI, with the sign of the vector normalized relative to the source orientations.

174 The ROI time-series was band-pass filtered between 13-30 Hz using a zero-phase finite impulse  
175 response filter to get the beta band time-course. The filter had a transition bandwidth of 3.25  
176 Hz for the lower pass-band edge and a transition bandwidth of 7.5 Hz for the upper edge. We  
177 then applied a Hilbert transformation to the filtered time-series to obtain the instantaneous beta  
178 power.



## Beta bursts in Parkinson's disease

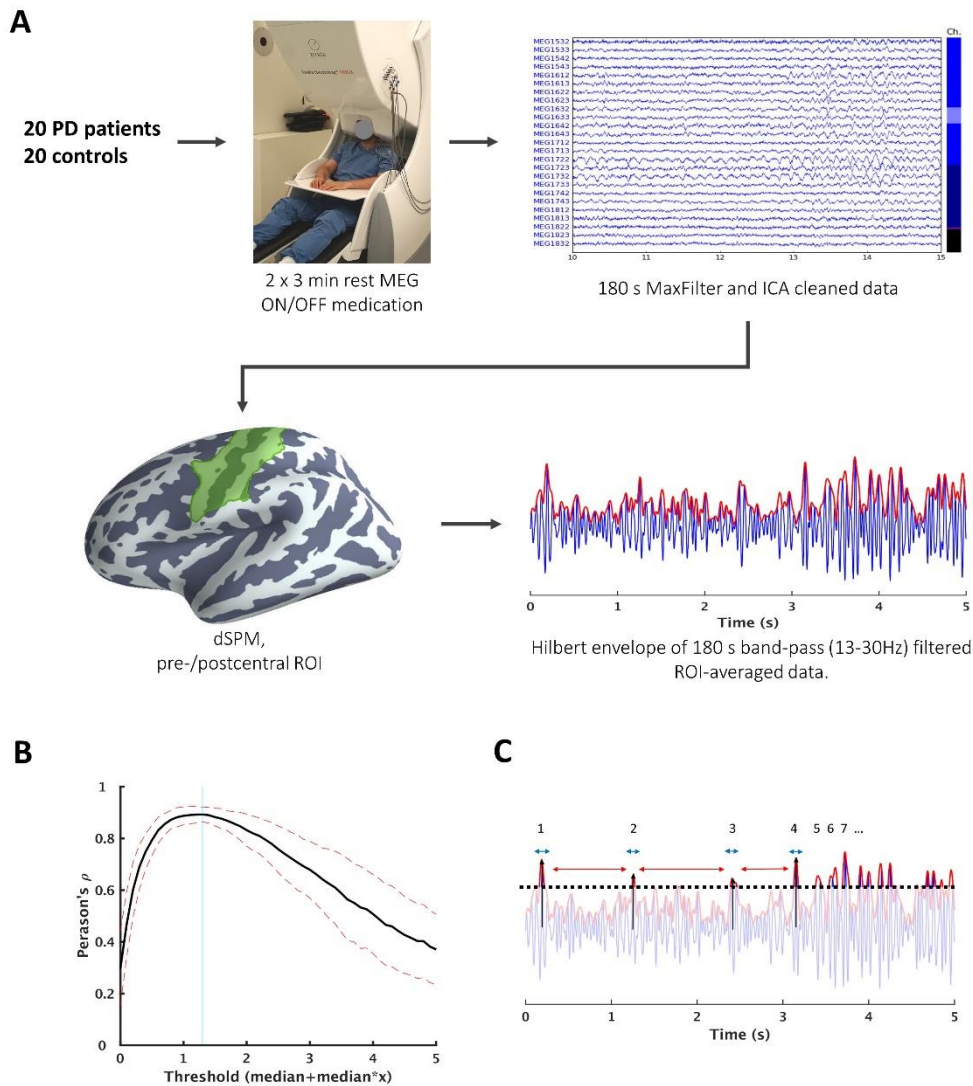

179

180 **Figure 1: Overview of data processing from raw MEG data to characterizing beta bursts.** A) We recorded three minutes  
 181 of resting-state MEG. Raw MEG data were first processed with tSSS and ICA to remove artifacts. We then did a dSPM source  
 182 reconstruction and extracted the time-series from an ROI consisting of the pre-/postcentral gyri and central sulcus. The ROI  
 183 time-series was filtered to the beta range (13-30 Hz) and Hilbert-transformed. B) High-amplitude epochs were determined  
 184 based on a threshold defined as the cutoff that had the highest correlation between the number of epochs and amplitude in  
 185 consecutive 3.0 s segments. The vertical line indicates the threshold used in the analysis. C) Once the threshold was defined,  
 186 we compared four features of the high-amplitude epochs: *rate* (i.e., count occurrence high-amplitude epochs), *duration* (blue  
 187 arrow), the *inter-burst interval* (red arrow), and *peak amplitude* (black arrow). *MEG*: magnetoencephalography; *ICA*:  
 188 independent component analysis; *dSPM*: dynamic statistical parametric mapping; *ROI*: region of interest.

### 189 2.5 Defining beta bursts

190 To assess and compare beta burst, we defined high-amplitude epochs in the envelope of the time-  
 191 series above a fixed threshold defined in order of medians above the median of the envelope  
 192 for each participant. To determine the value of the threshold, we took the correlation coefficient

193 between the average amplitude of the signal envelope and the number of detected epochs within  
194 consecutive 3.0 seconds of data. This gave a single correlation coefficient per threshold per  
195 subject, which were averaged across all subjects. The threshold with the highest correlation  
196 between the number of epochs and signal amplitude was used as the fixed threshold in the  
197 comparisons (Fig. 1B). Defining the threshold in orders of medians, rather than an absolute  
198 cutoff value, gives a threshold that preserved the statistical properties at the group-level but  
199 fitted to the dynamic range of the individual subjects' time-series. Similar methods for defining  
200 thresholds have been used to identify beta bursts in event-related studies (Feingold et al., 2015;  
201 Shin et al., 2017). Here we extended the method to resting-state MEG.

202 Once the threshold was defined, we extracted four features of the high-amplitude epochs (Fig.  
203 1C). The first feature was the *rate* of occurrence within the three-minute time-series. The  
204 purpose of the first feature was to answer if the beta band were more "bursty" in one group  
205 compared to the other and whether it changed due to medication. The second feature was the  
206 epoch *duration*, defined as the time between the epoch reached the half-max of the peak value  
207 until it once again reached the half-max of the peak value (unless the half-max of the peak was  
208 above the threshold, in which case the time of threshold crossing was used to indicate the onset  
209 and offset). The purpose of the second feature was to answer if the high-amplitude epochs  
210 resembled "true" bursts (i.e., durations approximating one or two beta cycles) or perhaps  
211 showed prolonged high-amplitude activity in one of the groups. The third feature was the *inter-*  
212 *burst interval*, defined as the time from the offset of one epoch to the onset of the next even.  
213 The fourth and final feature was the *peak amplitude* of the envelope within each epoch.

## 214 **2.6 Power spectral densities**

215 To compare how the time-domain analysis compares to Fourier-based analysis of beta power  
216 in the frequency-domain, we calculated the PSD of the unfiltered ROI time-series in the  
217 spectrum from 1-48 Hz. We divided the time-series into consecutive epochs of three seconds  
218 with a 50% overlap and applied a Hanning taper before applying a fast Fourier transform using  
219 FieldTrip (Oostenveld et al., 2011) in MATLAB (R2016b; MathWorks Inc.).

## 220 **2.7 Statistics**

### 221 **2.7.1 Group characteristics**

222 First, we tested for differences in age, sex ratio, and MoCA score between the Parkinson's  
223 patients and healthy controls to ensure that the demographics of the two groups were adequately  
224 matched. Comparison of age and MoCA score by "Bayesian t-tests" (Rouder et al., 2009) using

225 the *BayesFactor* package (Morey and Rouder, 2018) for R (R Core Team, 2013). The test gives  
226 the ratio of evidence for the hypothesis that there is a group difference versus the null-  
227 hypothesis of no difference between groups. To test for difference in the male-female ratio  
228 between groups, we used a Bayesian test for unequal multinomial distributions (Günel and  
229 Dickey, 1974).

### 230 **2.7.2 Power spectral densities**

231 The PSDs were compared with pairwise cluster-based permutations tests across the spectrum  
232 from all 1-48 Hz. Independent t-test was first done on all frequency bins in the PSD. Adjacent  
233 t-values ( $df = 18$  for within-group and  $df = 36$  for between-group comparison) above or below  
234 the critical value ( $\alpha < 0.05$ , two-tailed) were summed to gain the cluster T-value and then  
235 repeated on permuted datasets with randomized labels ( $n = 1000$ ). The null hypothesis was  
236 rejected if the observed dataset had a largest cluster T-value above the 95th percentile of the  
237 permuted T-values (Maris and Oostenveld, 2007). The PSDs were compared across sessions  
238 within groups, between groups within sessions, and the interaction between groups and  
239 sessions. In addition to comparing the full spectrum between groups and sessions, we compared  
240 the relative power in the beta band by integrating the PSD in the beta range (13-30 Hz) and  
241 dividing it by integral of the full spectrum. The comparison of the relative beta power was done  
242 by pairwise Bayesian t-tests with the *BayesFactor* package in R.

### 243 **2.7.3 Beta burst features**

244 The *rate*, *duration*, *inter-burst interval*, and *peak amplitude* were all analyzed by Bayesian  
245 mixed-effect regression, estimated in R with the *brms* package (Bürkner, 2017). The models  
246 used uninformative priors and were estimated by Markov-Chain Monte-Carlo sampling  
247 drawing 20.000 samples across four chains and discarding the first half of each chain. The  
248 convergence of the chains was confirmed by checking  $\hat{R} \approx 1$  (Gelman and Rubin, 1992).

249 We analyzed the epoch *rate* by mixed-effect Poisson regression containing Group  
250 (patient/control) and Session (first/second) as fixed effects with subjects as a random effect.  
251 The analysis of *duration*, *inter-burst interval*, and *peak amplitude* used the values for each  
252 epoch modeling the value of the  $i$ th epoch for participant  $j$  as a function of Group and Session  
253 by mixed-effect regression using the values of each epoch for all subjects. The *inter-burst*  
254 *interval* model used a log-normal link function, taking the log-transformed times to be Gaussian  
255 distributed. The models for *duration* and *peak amplitude* used shifted log-normal link functions  
256 that take the values subtracted a constant to follow a log-normal distribution.

257 Comparison between groups and sessions was done by comparing the marginal evidence—or  
258 Bayes factor (BF)—between models with and with the factor Group, Session, and the  
259 interaction between Group and Session as fixed effects.  $BF > 1$  is evidence for the alternative  
260 hypothesis, whereas  $BF < 1$  is evidence for the null-hypothesis. We use the guidelines by  
261 Wetzels et al., (2011) to determine the strength of the evidence where  $0.33 < BF < 3$  is taken as  
262 conclusive support for the alternative- or null-hypothesis. Values between 0.33 and 3 are  
263 inconclusive evidence. Post hoc hypothesis testing was done testing if at least 95% posterior  
264 distribution of individual parameters did not contain zero. The resulting test statistic is the  
265 probability  $P$  ranging from 0 to 1.  $P$  close to 0 is evidence for a difference between conditions,  
266 whereas  $P$  close to 1 provides evidence against a difference. We used the 95% posterior  
267 distribution corresponding to critical  $\alpha = 0.05$ .

#### 268 **2.7.4 Comparison across thresholds**

269 To explore if the inference from the primary analysis was dependent on the threshold used to  
270 define the high-amplitude epochs, we repeated the comparison of the high-amplitude epoch rate  
271 between groups and sessions across thresholds. At each threshold—starting at the median to  
272 five times the order of median in steps of 0.1—we defined epochs as described above. The  
273 number of beta bursts at each threshold was analyzed by mixed-effect Poisson regression as in  
274 the primary analysis. We then compared models with and without the factor Group, Session,  
275 and the interaction between Group and Session to get a Bayes factor for each factor at each  
276 threshold. The model used uninformative priors and was estimated by Markov-Chain Monte-  
277 Carlo sampling drawing 4.000 samples across four chains and discarding the first half of each  
278 chain.

#### 279 **2.7.5 Beta burst rate and motor symptoms**

280 In addition to the group-level comparisons, we investigated the relationship between the burst  
281 rate and motor symptom severity measured with the MDS-UPDRS-III for the Parkinson's  
282 patients. Since previous studies have shown that (frequency-domain) beta power is correlated  
283 with specific motor symptoms of rigidity and bradykinesia (Airaksinen et al., 2012, 2015;  
284 Melgari et al., 2014), we divided the MDS-UPDRS-III scores into six subscales of different  
285 motor symptoms according to the factors described by Goetz et al., (2008) with the exception  
286 that left- and right-side bradykinesia was combined into one factor. Each MDS-UPDRS-III  
287 factor (midline function, rest tremor, rigidity, bradykinesia, postural and kinetic tremor, lower  
288 limb bradykinesia) was modeled by mixed-effect Poisson regression as a linear function of the  
289 burst rate and subject and session as random intercepts. With these models, we tested the

290 association between beta burst rate and the MDS-UPDRS-III factor scores by testing if at least  
291 95% of the posterior distribution did not contain zero. All models model used uninformative  
292 priors and was estimated with *brms* (Bürkner, 2017) by Markov-Chain Monte-Carlo sampling  
293 drawing 20.000 samples across four chains and discarding the first half of each chain.

### 3 Results

#### 294 3.1 Group characteristics

295 The groups are adequately matched for comparison as there were no systematic differences in  
296 the demographic variables: male/female ratio (BF = 0.60), age (BF = 0.41), and cognitive ability  
297 (BF = 0.39), see Table 1.

298 The Parkinson's patients showed 26%-72% (mean 49%) improvement on motor symptoms on  
299 the MDS-UPDRS-III in the ON state compared to the OFF state (BF =  $4.70 \times 10^7$ ).

#### 300 3.2 Power spectral densities

301 The cluster-based permutations test of the PSDs (Fig. 2) did not show any clusters of difference  
302 in any of the comparisons; thus, we cannot reject the null hypothesis that there is no difference  
303 between groups or sessions.

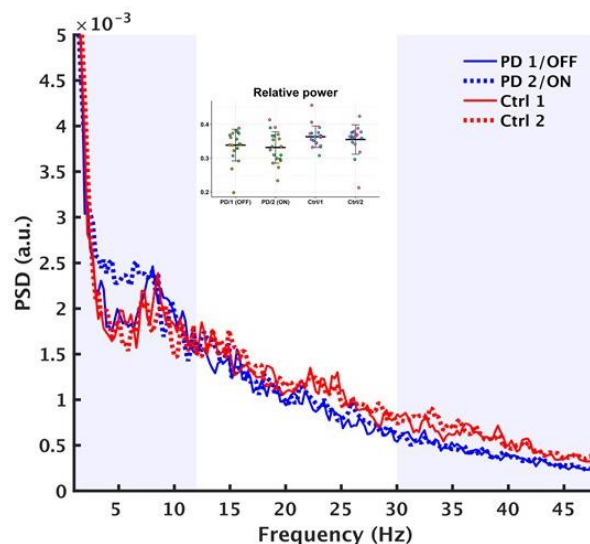

304

305 **Figure 2: Group-level averaged power spectral densities.** Parkinson's patients in blue and healthy controls in red. solid lines  
306 is the first session/OFF medication and dashed lines is the second session/ON medication. The insert indicates the relative  
307 power of the beta band (13-30 Hz). PSD: power spectral density.

308 Comparison of the relative beta power gave evidence against a different between the first and  
309 second session for the controls (BF = 0.37) or between ON and OFF medication for the

310 Parkinson's patients (BF = 0.34). The comparison between the groups in the first session/OFF  
311 medication showed evidence for a difference between the groups but only as inconclusive  
312 evidence (BF = 1.27) and gave inconclusive evidence against a difference between the groups  
313 in the second session (BF = 0.87). Based on the comparisons in the frequency domain, we are  
314 not able to conclude that there is a difference between groups or between sessions.

### 315 3.3 Beta burst rate

316 The Parkinson's patients showed an average rate of 106 bursts/min (SD: 8) in the first  
317 session/OFF medication and 108 bursts/min (SD: 11) in the second session/ON medication.  
318 The controls had an average rate of 120 bursts/min (SD: 11) in the first session and 116  
319 bursts/min (SD: 15) in the second session. Fig. 3 shows the burst rate for all subjects across  
320 groups and sessions.

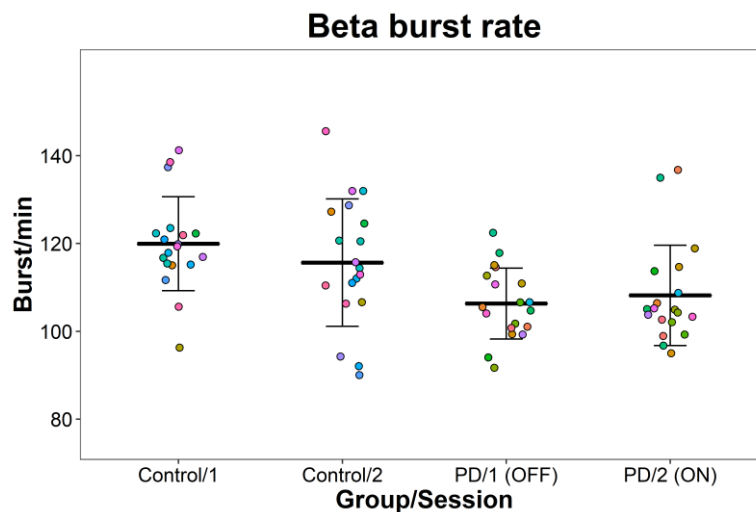

321  
322 **Figure 3: Beta burst rate in the sensorimotor areas across groups and sessions.** The points represent the beta bursts rate  
323 for each participant. The bars are means and standard deviations.

324 The model comparison showed evidence for an effect of Group (BF = 10.9) but gave evidence  
325 against an effect of Session (BF = 0.062) and gave evidence against interaction between Group  
326 and Session (BF = 0.24).

327 The Parkinson's patients had 5-17% (median: 11%) lower rate in the OFF state compared to  
328 healthy controls ( $P < 0.0016$ ). The change in rate from the OFF to the ON state varied from a  
329 4% reduction to 8% increase (median 2% increase) and was not significantly different from  
330 zero ( $P = 0.60$ ). The healthy controls showed a change in burst rate from the first to the second  
331 that ranged from a 9% decrease to a 2% increase (median: 3% decrease). The change in burst

332 rate between session for the healthy controls was not significantly different from zero ( $P =$   
333 0.22).

### 334 **3.4 Burst duration**

335 The high-amplitude epochs showed that the beta bursts were short, with a median duration  
336 between 73-76 ms in both sessions and groups (see Table 2). 95% of the epoch duration  
337 distributions fell within 35-170 ms. The median duration of the beta bursts corresponded  
338 roughly to a single oscillatory cycle in the beta frequency range (approximately 13-14 Hz).

339 The comparison of the burst durations showed evidence against an effect of Session ( $BF =$   
340 0.046), gave evidence against an effect of Group ( $BF = 0.17$ ), and gave evidence against the  
341 interaction between Session and Group, though the evidence is in the inconclusive range ( $BF =$   
342 0.59).

343 **Table 2: Group-level summary of beta burst features (medians and 95%-predictive intervals).**

| <b>Group-session</b>              | <b>Bursts/min</b> | <b>Duration</b> | <b>Inter-burst interval</b> | <b>dSPM peak amplitude</b> |
|-----------------------------------|-------------------|-----------------|-----------------------------|----------------------------|
| <i>Parkinson's patients 1/OFF</i> | 106 (86-128)      | 74 ms (36-165)  | 184 ms (9-3903)             | 0.99 (0.61-1.74)           |
| <i>Parkinson's patients 2/ON</i>  | 108 (88-130)      | 76 ms (37-170)  | 177 ms (9-3686)             | 1.00 (0.61-1.77)           |
| <i>Healthy controls 1</i>         | 120 (98-142)      | 73 ms (36-163)  | 136 ms (7-2887)             | 0.95 (0.59-1.65)           |
| <i>Healthy controls 2</i>         | 116 (95-138)      | 73 ms (35-159)  | 147 ms (7-2901)             | 0.98 (0.60-1.73)           |

344 *dSPM*: dynamic statistical parametric map

### 345 **3.5 Inter-burst intervals**

346 The inter-burst intervals had a skewed distribution with a high probability of short intervals  
347 below 200 ms with few longer intervals that could last up to seconds (Fig. 4B). The model  
348 comparison showed evidence against an effect of Session ( $BF = 0.049$ ) and evidence for an  
349 effect of Group ( $BF = 283$ ). For the inter-burst intervals, there was evidence for an interaction  
350 between Group and Session ( $BF = 5173$ ).

## Beta bursts in Parkinson's disease

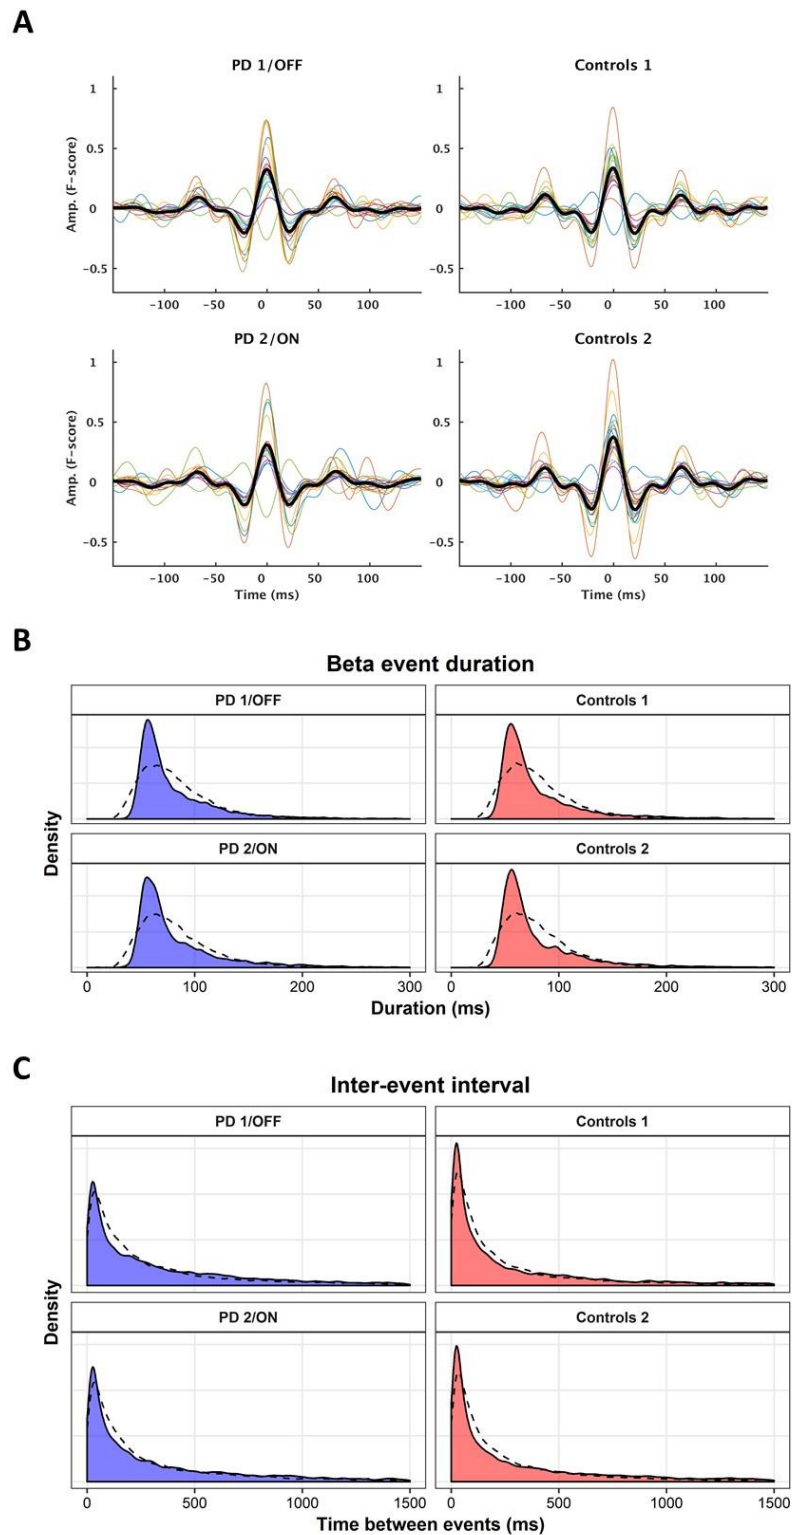

351

352 **Figure 4: Beta burst features.** A) Average beta bursts time-locked to the burst peak for each group/session. Thick lines are  
353 the grand average, and colored lines are individual subjects. Pooled distributions of the burst duration (B) and inter-burst  
354 intervals (C) across groups and sessions. Dashed lines in (B) and (C) are the group-level predicted values of the models.



355 The model showed a median inter-burst interval of 187 ms (mean: 631 ms, 95%-I: 9-3903 ms)  
356 for patients OFF medication, compared to a median inter-burst interval of 136 ms (mean: 442  
357 ms, 95%-I: 7-2887 ms) for healthy controls in the first session ( $P < 10^{-4}$ ). The median inter-  
358 burst interval decreased to 177 ms (mean: 560 ms, 95%-I: 9-3686 ms) in the ON medicated,  
359 corresponding to a 10% decrease (CI: 4%-14%) in the inter-burst intervals from the OFF to ON  
360 medication state ( $P = 2 \times 10^{-4}$ ). The inter-burst interval changed in the opposite for the healthy  
361 controls and increased by 8% (CI: 3-14%) between sessions ( $P = 0.003$ ).

### 362 **3.6 Peak amplitude**

363 Fig. 4A depicts averaged beta burst time-locked to the peak amplitude. The peak amplitude of  
364 the beta bursts only differed between sessions independent of the group. The model comparison  
365 of the peak amplitude showed evidence for an effect of Session ( $BF = 1.6 \times 10^9$ ), but evidence  
366 against an effect of Group ( $BF = 0.46$ ) and evidence against the model that included the  
367 interaction between Session and Group ( $BF = 0.48$ )—though the BFs are in the inconclusive  
368 range for the two latter model comparisons. The peak amplitude increased for both controls and  
369 patients in the second session with an increase of 4% (CI: 3-5%;  $P < 10^{-4}$ ) for controls and an  
370 increase of 2% (CI: 1-3%;  $P = 0.002$ ) for the Parkinson's patients.

### 371 **3.7 Comparison across thresholds**

372 To investigate how the threshold for defining beta bursts influenced the inference, we repeated  
373 the comparison of the burst rate across a range of thresholds. Fig. 5B shown the Bayes factors  
374 of the comparison across the thresholds. The model comparisons for all thresholds above one  
375 unit of medians favored a difference in the number of beta bursts between controls and patients  
376 with the patients having fewer beta bursts than the controls. At higher thresholds, the  
377 comparison favored and interaction between Group and Session, with an increase in the burst  
378 rate from OFF to ON but also increased variation (Fig. 5A). Since the inference one would draw  
379 at different thresholds is consistent across thresholds (with the exception of the very low and  
380 high thresholds), we conclude that the inference is not too dependent on the precise numerical  
381 threshold.

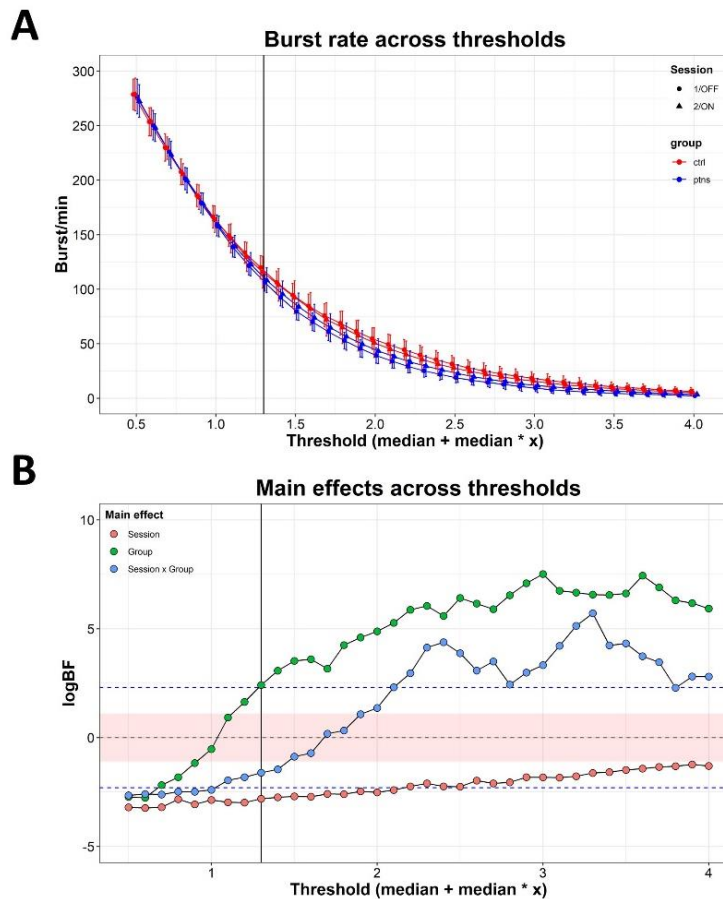

382

383 **Figure 5: Comparison across thresholds for defining beta bursts.** A) The beta burst rate depending on the thresholds used  
384 to define beta bursts for both groups and sessions. B) The results of the Bayesian-model comparison across thresholds. The red  
385 area indicates the interval where the Bayes factors are considered inconclusive for or against the hypothesis and the dashed red  
386 lines indicate “substantial” evidence for (upper line) or against (lower line) the hypothesis, following the guidelines by Wetzels  
387 et al. (2011). The vertical line indicates the threshold used in the primary analysis. *logBF*: logarithm of Bayes factor.

### 388 3.8 Beta burst rate and motor symptoms

389 Fig. 6 shows the marginal predicted effects of the burst rate and the subscales of the MSD-  
390 UPDRS-III from the regression models. The burst rate scaled negatively with bradykinesia ( $P = 0.038$ ). The regression model predicted a decrease of 29% (95%CI: 10-45%) in bradykinesia  
391 rating when the burst rate increased by 10. The burst rate further scaled negatively with  
392 postural/kinetic tremor ( $P = 0.028$ ), predicting 40% (95%CI: 16-59%) decrease in symptom  
393 rating when the burst rate increased by 10. We saw no evidence that midline function ( $P = 0.44$ ),  
394 rest tremor ( $P = 0.71$ ), rigidity ( $P = 0.87$ ), nor lower limb bradykinesia ( $P = 0.28$ ) scaled with  
395 the burst rate.  
396

## Beta bursts in Parkinson's disease

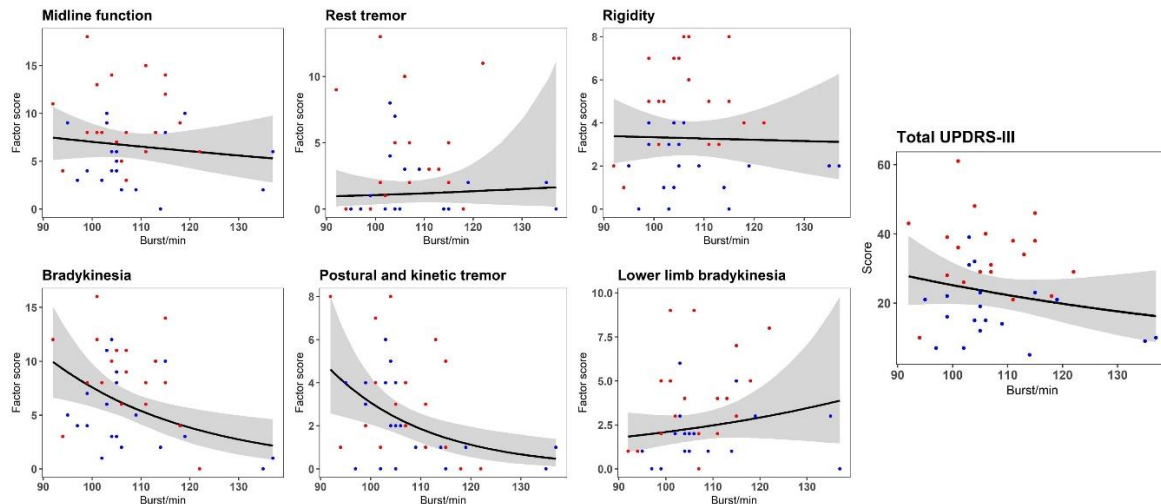

397

398 **Figure 6: Relation between the beta bursts rate and MDS-UPDRS-III subscales.** Colored dots are individual measurements  
399 OFF (red) and ON (blue) medication. Lines and shades indicate the predicted marginal effect of burst rate on the score on  
400 MDS-UPDRS-III subscales. *MDS-UPDRS-III*: Movement Disorder Society's Unified Parkinson's Disease Rating Scale, part  
401 III.

## 4 Discussion

402 The primary aim of this study was to explore whether beta burst characteristics differed between  
403 Parkinson's patients and healthy controls. As a secondary aim, we also explored whether beta  
404 burst characteristics vary within Parkinson's patients because of dopaminergic medication; and  
405 finally, as a third aim, explored whether beta burst characteristics were related to symptom  
406 severity in Parkinson's disease.

407 When the Parkinson's patients were OFF medication showed a 6-17% lower beta burst rate  
408 compared to healthy controls. This reduction of in beta burst rate was still present when the  
409 patients were ON medication. Neither the duration nor the amplitude of the beta bursts differed  
410 between patients and controls. Our results add to the evidence that the cortical activity in the  
411 beta band exhibits transient bursts lasting a one or two cycles. This is in line with the research  
412 from Sherman et al. (2016), who proposed that beta burst in the cortex is caused by a short  
413 distal drive in the upper laminar layers lasting around 50 ms in combination with a sustained  
414 excitatory proximal drive between the upper and lower cortical layers. The consistency in  
415 duration and amplitude suggests that some components of the mechanisms that generate the  
416 cortical beta bursts are preserved in Parkinson's disease, while the rate of bursts decreases with  
417 the disease and with symptom severity. This reduction in spontaneous beta bursts in the

418 sensorimotor cortex could potentially be driven by a reduction in distal connections from  
419 thalamus or the basal ganglia.

420 The distribution of the inter-bursts interval more resembled the distributions of the healthy  
421 controls when patients were on medication. What this means in terms of disease-related  
422 mechanisms is currently unclear as the underlying dynamics that drive the beta bursts is  
423 unknown. It is possible that the shift in inter-burst interval following dopaminergic medication  
424 is driven by a change in the distal drive from dopamine modulated activity in basal ganglia or  
425 thalamus. However, more research is needed to understand how the cortical beta bursts are  
426 driven by deeper sources, which directions the connection goes, and how this is modulated by  
427 dopaminergic medication. The effect of dopaminergic medication on the beta band seems to be  
428 much more complex than changes in the average power in the beta band. Rather, by assessing  
429 the beta activity in terms of beta burst and analyzing the characteristics of these events, it seems  
430 that what mainly changes in the temporal distribution of transient beta bursts.

431 We did not find an effect of dopaminergic medication on the burst rate, nor on the burst  
432 duration. Since the study was exploratory and we did not have prior estimates of an expected  
433 effect size of medication and that our sample size was relatively small ( $n = 19$ ), there might be  
434 effects of medication that we have not detected with this analysis approach. At higher thresholds  
435 than the one used in the main analysis (Fig. 5), there was evidence for an effect of medication  
436 on the burst rate.

437 In the Parkinson's patients, the decrease in beta burst rate was associated with an increase in  
438 symptom severity for bradykinesia and postural/kinetic tremor. Such a link between burst rate  
439 and bradykinesia is in line with previous studies showing that decreased beta power in the  
440 cortex is related to increased bradykinesia (Airaksinen et al., 2012, 2015; Melgari et al., 2014).  
441 A reduction in the average PSD is compatible with the reduction in the number of spontaneous  
442 high-amplitude bursts as well as a reduction in sustained oscillatory activity. However, in our  
443 results, we did not observe any conclusive differences between Parkinson's patients and healthy  
444 controls in the averaged PSD that corresponds to those we report for the analysis of beta bursts  
445 (only an inconclusive trend for the relative beta power). For our data, frequency-domain  
446 analysis using the traditional Fourier-transform method thus seems to be less sensitive in  
447 picking up statistically meaningful differences in beta activity between Parkinson's patients and  
448 healthy controls compared to an analysis based on individual burst events.

449 The variation between the sessions for the healthy controls may reflect the test-retest variability  
450 of the measurements, which were between a 9% decrease to a 2% increase in beta burst rate.  
451 This variation can also reflect a circadian effect on the spontaneous beta bursts. It has previously  
452 been shown that the frequency domain beta power varies with the time of the day (Wilson et  
453 al., 2014). It is plausible that similar circadian effects apply to beta bursts in the time-domain.  
454 All participants—Parkinson's patients and controls alike—were tested in the morning and again  
455 before noon on the same day in our study.

456 The presence of cortical beta band activity is inversely related to motor function: a decrease in  
457 beta band activity indicates an increased sensitivity to efferent and afferent sensorimotor  
458 signals, whereas increased activity has been linked to inhibition of sensorimotor signals  
459 (Brown, 2007; Engel and Fries, 2010). Close temporal proximity between beta bursts and go  
460 cues leads to longer reaction times (Little et al., 2018; Lofredi et al., 2019) and less likelihood  
461 of detecting sensory stimuli close to the sensory threshold (Shin et al., 2017), suggesting that  
462 the proximity of beta bursts blocks immediate sensorimotor processing. Spontaneous beta  
463 bursts thus seems to have a transient inhibitory effect on the sensorimotor processing, but might  
464 at the same time serve as a signal that is necessary to maintaining a continuous optimal state of  
465 sensorimotor processing (Engel and Fries, 2010; Jenkinson and Brown, 2011). This  
466 interpretation entails that the beta bursts serve as an immediate updating of the sensorimotor  
467 system by integrating the previous motor signal and proprioceptive signal (Leventhal et al.,  
468 2012). The beta bursts might be inhibitive, as evidenced by their behavioral effects on event-  
469 related sensorimotor tasks (Shin et al., 2017; Little et al., 2018), but keeping maintenance of  
470 the sensorimotor system over a longer time. The inverse relation between the number of  
471 spontaneous beta bursts and bradykinesia, that we report in this study, might hence be due to a  
472 deficit in the updating of the sensorimotor system, which leads to suboptimal utilization of  
473 neural resources when initiating and performing movements manifesting as bradykinesia and  
474 kinetic tremors.

475 It is well known that beta activity is altered in Parkinson's disease, which is often evident at the  
476 frequency domain on decomposed and averaged time-series of electrophysiological activity.  
477 However, that approach implicitly assumes that the average signal is representative of the whole  
478 time-series. The neuronal oscillations in the beta band change over time by exhibiting transient  
479 beta bursts lasting 70-80 ms. We have shown that the burst duration is similar for both healthy  
480 adults and Parkinson's patients—but that the *burst rate* is reduced in Parkinson's disease. The  
481 spontaneous dynamics in the beta band, such as burst events and burst characteristics, might

## Beta bursts in Parkinson's disease

482 hold further information that is relevant for understanding Parkinson's disease and the  
483 development of motor symptoms. Modulation of the dynamic changes in the beta activity due  
484 to the dopaminergic medication has been shown in deep-brain recordings from STN in  
485 Parkinson's patients (Tinkhauser et al., 2017a, b). Recordings of the electrical field in STN is  
486 only done in patients who undergo brain surgery. It is, therefore, not feasible for diagnostic  
487 purposes. Here we show that Parkinson's patients exhibit a reduction in the beta bursts rate  
488 compared to healthy controls and that this can be measured from the cortex non-invasively  
489 using MEG.

## Acknowledgments

490 Data for this study was collected at NatMEG, the National Facility for  
491 Magnetoencephalography (<http://natmeg.se>), Karolinska Institutet, Sweden. The NatMEG  
492 facility is supported by Knut & Alice Wallenberg (grant #KAW2011.0207). We are thankful to  
493 Allison Eriksson for proofreading the manuscript.

## Funding

494 This study, including the work of MCV, PT, JW, PS, MI, and DL, was supported by the Swedish  
495 Foundation for Strategic Research (SBE 13-0115).

## Competing interests

496 The authors declare no competing interests.

## Data Availability

497 The datasets collected for the current study contains patient information that cannot be made  
498 public. The dataset is available from the corresponding author for review purpose or on  
499 reasonable request. Scripts for running the analysis presented in the paper is available at  
500 [www.github.com/mcvinding/PD\\_beta\\_bursts](http://www.github.com/mcvinding/PD_beta_bursts).

## References

- Abbasi O, Hirschmann J, Storzer L, Özkurt TE, Elben S, Vesper J, et al. Unilateral deep brain stimulation suppresses alpha and beta oscillations in sensorimotor cortices. *NeuroImage* 2018; 174: 201–207.
- Airaksinen K, Butorina A, Pekkonen E, Nurminen J, Taulu S, Ahonen A, et al. Somatomotor mu rhythm amplitude correlates with rigidity during deep brain stimulation in Parkinsonian patients. *Clinical Neurophysiology* 2012; 123: 2010–2017.
- Airaksinen K, Lehti T, Nurminen J, Luoma J, Helle L, Taulu S, et al. Cortico-muscular coherence parallels coherence of postural tremor and MEG during static muscle contraction. *Neuroscience Letters* 2015; 602: 22–26.
- Alonso-Frech F, Zamarbide I, Alegre M, Rodriguez-Oroz MC, Guridi M, Manrique M, et al. Slow oscillatory activity and levodopa-induced dyskinesias in Parkinson's disease. *Brain* 2006; 129: 1748–1757.
- American Psychiatric Association. *Diagnostic and Statistical Manual of Mental Disorders*. Fifth edition. Arlington, VA: American Psychiatric Publishing; 2013
- Bartolo R, Merchant H. Oscillations Are Linked to the Initiation of Sensory-Cued Movement Sequences and the Internal Guidance of Regular Tapping in the Monkey. *Journal of Neuroscience* 2015; 35: 4635–4640.
- Bosboom JLW, Stoffers D, Stam CJ, van Dijk BW, Verbunt J, Berendse HW, et al. Resting state oscillatory brain dynamics in Parkinson's disease: An MEG study. *Clinical Neurophysiology* 2006; 117: 2521–2531.
- Brown P. Abnormal oscillatory synchronisation in the motor system leads to impaired movement. *Current Opinion in Neurobiology* 2007; 17: 656–664.
- Bürkner P-C. brms: An R Package for Bayesian Multilevel Models Using Stan. *Journal of Statistical Software* 2017; 80
- Cao C-Y, Zeng K, Li D-Y, Zhan S-K, Li X-L, Sun B-M. Modulations on cortical oscillations by subthalamic deep brain stimulation in patients with Parkinson disease: A MEG study. *Neuroscience Letters* 2017; 636: 95–100.
- Dale AM, Fischl B, Sereno MI. Cortical Surface-Based Analysis: I. segmentation and surface reconstruction. *NeuroImage* 1999; 9: 179–194.



- Dale AM, Liu AK, Fischl BR, Buckner RL, Belliveau JW, Lewine JD, et al. Dynamic Statistical Parametric Mapping: Combining fMRI and MEG for High-Resolution Imaging of Cortical Activity. *Neuron* 2000; 26: 55–67.
- Destrieux C, Fischl B, Dale A, Halgren E. Automatic parcellation of human cortical gyri and sulci using standard anatomical nomenclature. *NeuroImage* 2010; 53: 1–15.
- Engel AK, Fries P. Beta-band oscillations—signalling the status quo? *Current Opinion in Neurobiology* 2010; 20: 156–165.
- Feingold J, Gibson DJ, DePasquale B, Graybiel AM. Bursts of beta oscillation differentiate postperformance activity in the striatum and motor cortex of monkeys performing movement tasks. *Proc Natl Acad Sci USA* 2015; 112: 13687–13692.
- Gelman A, Rubin DB. Inference from Iterative Simulation Using Multiple Sequences. *Statistical Science* 1992; 7: 457–472.
- Giannicola G, Marceglia S, Rossi L, Mrakic-Sposta S, Rampini P, Tamma F, et al. The effects of levodopa and ongoing deep brain stimulation on subthalamic beta oscillations in Parkinson's disease. *Experimental Neurology* 2010; 226: 120–127.
- Goetz CG, Fahn S, Martinez-Martin P, Poewe W, Sampaio C, Stebbins GT, et al. Movement Disorder Society-sponsored revision of the Unified Parkinson's Disease Rating Scale (MDS-UPDRS): Process, format, and clinimetric testing plan. *Movement Disorders* 2007; 22: 41–47.
- Goetz CG, Tilley BC, Shaftman SR, Stebbins GT, Fahn S, Martinez-Martin P, et al. Movement Disorder Society-sponsored revision of the Unified Parkinson's Disease Rating Scale (MDS-UPDRS): Scale presentation and clinimetric testing results. *Movement Disorders* 2008; 23: 2129–2170.
- Gramfort A, Luessi M, Larsson E, Engemann DA, Strohmeier D, Brodbeck C, et al. MEG and EEG data analysis with MNE-Python. *Frontiers in Neuroscience* 2013; 7
- Gûnel E, Dickey J. Bayes factors for independence in contingency tables. *Biometrika* 1974; 61: 545–557.
- Heinrichs-Graham E, Kurz MJ, Becker KM, Santamaria PM, Gendelman HE, Wilson TW. Hypersynchrony despite pathologically reduced beta oscillations in patients with Parkinson's disease: a pharmaco-magnetoencephalography study. *Journal of Neurophysiology* 2014; 112: 1739–1747.

- Hoehn MM, Yahr MD. Parkinsonism: onset, progression, and mortality. *Neurology* 1967; 17: 427–427.
- Holmes CJ, Hoge R, Collins L, Woods R, Toga AW, Evans AC. Enhancement of MR Images Using Registration for Signal Averaging: *Journal of Computer Assisted Tomography* 1998; 22: 324–333.
- Hyvarinen A. Fast and robust fixed-point algorithms for independent component analysis. *IEEE Transactions on Neural Networks* 1999; 10: 626–634.
- Jenkinson N, Brown P. New insights into the relationship between dopamine, beta oscillations and motor function. *Trends in Neurosciences* 2011; 34: 611–618.
- Kalia LV, Lang AE. Parkinson's disease. *The Lancet* 2015; 386: 896–912.
- Kühn AA, Kupsch A, Schneider G-H, Brown P. Reduction in subthalamic 8-35 Hz oscillatory activity correlates with clinical improvement in Parkinson's disease: STN activity and motor improvement. *European Journal of Neuroscience* 2006; 23: 1956–1960.
- Leventhal DK, Gage GJ, Schmidt R, Pettibone JR, Case AC, Berke JD. Basal Ganglia Beta Oscillations Accompany Cue Utilization. *Neuron* 2012; 73: 523–536.
- Little S, Bonaiuto J, Barnes G, Bestmann S. Motor cortical beta transients delay movement initiation and track errors. *bioRxiv.org* 2018
- Lofredi R, Tan H, Neumann W-J, Yeh C-H, Schneider G-H, Kühn AA, et al. Beta bursts during continuous movements accompany the velocity decrement in Parkinson's disease patients. *Neurobiology of Disease* 2019
- Luoma J, Pekkonen E, Airaksinen K, Helle L, Nurminen J, Taulu S, et al. Spontaneous sensorimotor cortical activity is suppressed by deep brain stimulation in patients with advanced Parkinson's disease. *Neuroscience Letters* 2018; 683: 48–53.
- Mallet N, Pogosyan A, Sharott A, Csicsvari J, Bolam JP, Brown P, et al. Disrupted Dopamine Transmission and the Emergence of Exaggerated Beta Oscillations in Subthalamic Nucleus and Cerebral Cortex. *Journal of Neuroscience* 2008; 28: 4795–4806.
- Maris E, Oostenveld R. Nonparametric statistical testing of EEG- and MEG-data. *Journal of Neuroscience Methods* 2007; 164: 177–190.

- Martin S, Iturrate I, Chavarriaga R, Leeb R, Sobolewski A, Li AM, et al. Differential contributions of subthalamic beta rhythms and 1/f broadband activity to motor symptoms in Parkinson's disease. *npj Parkinson's Disease* 2018; 4: 32.
- Melgari J-M, Curcio G, Mastrolilli F, Salomone G, Trotta L, Tombini M, et al. Alpha and beta EEG power reflects L-dopa acute administration in parkinsonian patients. *Frontiers in Aging Neuroscience* 2014; 6: 302.
- Morey RD, Rouder JN. BayesFactor: Computation of Bayes Factors for Common Designs. [Internet]. 2018 Available from: <https://CRAN.R-project.org/package=BayesFactor>
- Neumann W-J, Staub-Bartelt F, Horn A, Schanda J, Schneider G-H, Brown P, et al. Long term correlation of subthalamic beta band activity with motor impairment in patients with Parkinson's disease. *Clinical Neurophysiology* 2017; 128: 2286–2291.
- Oostenveld R, Fries P, Maris E, Schoffelen J-M. FieldTrip: Open Source Software for Advanced Analysis of MEG, EEG, and Invasive Electrophysiological Data. *Computational Intelligence and Neuroscience* 2011; 2011: 1–9.
- Pollok B, Krause V, Martsch W, Wach C, Schnitzler A, Südmeyer M. Motor-cortical oscillations in early stages of Parkinson's disease: Suppression of motor cortical beta oscillations is altered in early PD. *The Journal of Physiology* 2012; 590: 3203–3212.
- R Core Team. R: A language and environment for statistical computing. Vienna, Austria; 2013
- Rodriguez-Oroz MC, Jahanshahi M, Krack P, Litvan I, Macias R, Bezard E, et al. Initial clinical manifestations of Parkinson's disease: features and pathophysiological mechanisms. *The Lancet Neurology* 2009; 8: 1128–1139.
- Rouder JN, Speckman PL, Sun D, Morey RD, Iverson G. Bayesian t tests for accepting and rejecting the null hypothesis. *Psychonomic Bulletin & Review* 2009; 16: 225–237.
- Sherman MA, Lee S, Law R, Haegens S, Thorn CA, Hämäläinen MS, et al. Neural mechanisms of transient neocortical beta rhythms: Converging evidence from humans, computational modeling, monkeys, and mice. *Proceedings of the National Academy of Sciences* 2016; 113: E4885–E4894.
- Shin H, Law R, Tsutsui S, Moore CI, Jones SR. The rate of transient beta frequency events predicts behavior across tasks and species. *eLife* 2017; 6

- Taulu S, Simola J. Spatiotemporal signal space separation method for rejecting nearby interference in MEG measurements. *Physics in Medicine and Biology* 2006; 51: 1759–1768.
- Tinkhauser G, Pogosyan A, Little S, Beudel M, Herz DM, Tan H, et al. The modulatory effect of adaptive deep brain stimulation on beta bursts in Parkinson's disease. *Brain* 2017; 140: 1053–1067.
- Tinkhauser G, Pogosyan A, Tan H, Herz DM, Kühn AA, Brown P. Beta burst dynamics in Parkinson's disease OFF and ON dopaminergic medication. *Brain* 2017; 140: 2968–2981.
- Tinkhauser G, Torrecillos F, Duclos Y, Tan H, Pogosyan A, Fischer P, et al. Beta burst coupling across the motor circuit in Parkinson's disease. *Neurobiology of Disease* 2018; 117: 217–225.
- Vinding MC, Tsitsi P, Piitulainen H, Waldthaler J, Jousmäki V, Ingvar M, et al. Attenuated beta rebound to proprioceptive afferent feedback in Parkinson's disease. *Scientific Reports* 2019; 9
- Wetzels R, Matzke D, Lee MD, Rouder JN, Iverson GJ, Wagenmakers E-J. Statistical Evidence in Experimental Psychology An Empirical Comparison Using 855 t Tests. *Perspectives on Psychological Science* 2011; 6: 291–298.
- Wilson TW, Heinrichs-Graham E, Becker KM. Circadian modulation of motor-related beta oscillatory responses. *NeuroImage* 2014; 102: 531–539.

## Figure legends

### 1 **Figure 1: Overview of data processing from raw MEG data to characterizing beta** 2 **bursts.**

3 A) We recorded three minutes of resting-state MEG. Raw MEG data were first processed with  
4 tSSS and ICA to remove artifacts. We then did a dSPM source reconstruction and extracted  
5 the time-series from an ROI consisting of the pre-/postcentral gyri and central sulcus. The  
6 ROI time-series was filtered to the beta range (13-30 Hz) and Hilbert-transformed. B) High-  
7 amplitude epochs were determined based on a threshold defined as the cutoff that had the  
8 highest correlation between the number of epochs and amplitude in consecutive 3.0 s  
9 segments. The vertical line indicates the threshold used in the analysis. C) Once the threshold  
10 was defined, we compared four features of the high-amplitude epochs: *rate* (i.e., count  
11 occurrence high-amplitude epochs), *duration* (blue arrow), the *inter-burst interval* (red  
12 arrow), and *peak amplitude* (black arrow). *MEG*: magnetoencephalography; *ICA*: independent  
13 component analysis; *dSPM*: dynamic statistical parametric mapping; *ROI*: region of interest.

### 14 **Figure 2: Group-level averaged power spectral densities.**

15 Parkinson's patients in blue and healthy controls in red. solid lines is the first session/OFF  
16 medication and dashed lines is the second session/ON medication. The insert indicates the  
17 relative power of the beta band (13-30 Hz). *PSD*: power spectral density.

### 18 **Figure 3: Beta burst rate in the sensorimotor areas across groups and sessions.**

19 The points represent the beta bursts rate for each participant. The bars are means and standard  
20 deviations.

### 21 **Figure 4: Beta burst features.**

22 A) Average beta bursts time-locked to the burst peak for each group/session. Thick lines are  
23 the grand average, and colored lines are individual subjects. Pooled distributions of the burst  
24 duration (B) and inter-burst intervals (C) across groups and sessions. Dashed lines in (B) and  
25 (C) are the group-level predicted values of the models.

### 26 **Figure 5: Comparison across thresholds for defining beta bursts.**

27 A) The beta burst rate depending on the thresholds used to define beta bursts for both groups  
28 and sessions. B) The results of the Bayesian-model comparison across thresholds. The red  
29 area indicates the interval where the Bayes factors are considered inconclusive for or against

30 the hypothesis and the dashed red lines indicate “substantial” evidence for (upper line) or  
31 against (lower line) the hypothesis, following the guidelines by Wetzels et al. (2011). The  
32 vertical line indicates the threshold used in the primary analysis. *logBF*: logarithm of Bayes  
33 factor.

34 **Figure 6: Relation between the beta bursts rate and MDS-UPDRS-III subscales.**

35 Colored dots are individual measurements OFF (red) and ON (blue) medication. Lines and  
36 shades indicate the predicted marginal effect of burst rate on the score on MDS-UPDRS-III  
37 subscales. *MDS-UPDRS-III*: Movement Disorder Society's Unified Parkinson's Disease Rating  
38 Scale, part III.
